# Supplementary material for: Maternal Intake of Either Fructose or the Artificial Sweetener Acesulfame-K Results in Differential and Sex-Specific Alterations in Markers of Skin Inflammation and Wound Healing Responsiveness in Mouse Offspring: A Pilot Study
Source: MDPI journal article supplement (doi:10.3390/nu15112534), 2023-05-29
Supplement: s1 [file s1]

**Supplementary Figure S1.** Semi-quantitative scoring of inflammatory markers IL1 $\beta$  and CD68 (macrophages) and Tnf $\alpha$  immunostaining in the epidermis and dermis at D5 and D9 post-wounding in male and female offspring.

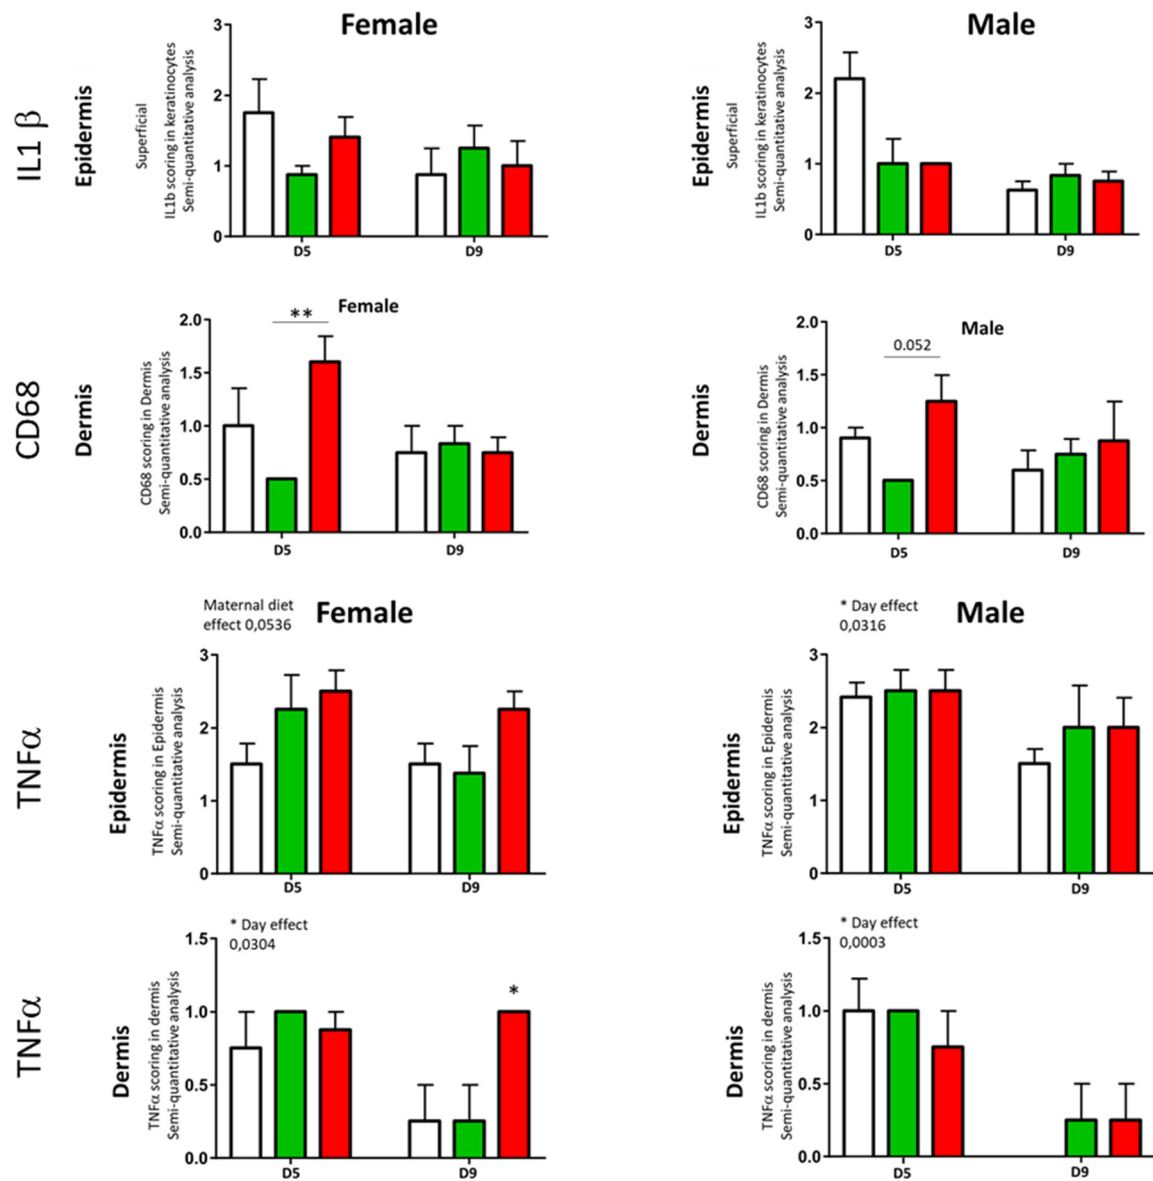

**Supplementary Figure S2.** CD-68 immunostaining in the epidermis and dermis at D5 and D9 post-wounding in male and female offspring.

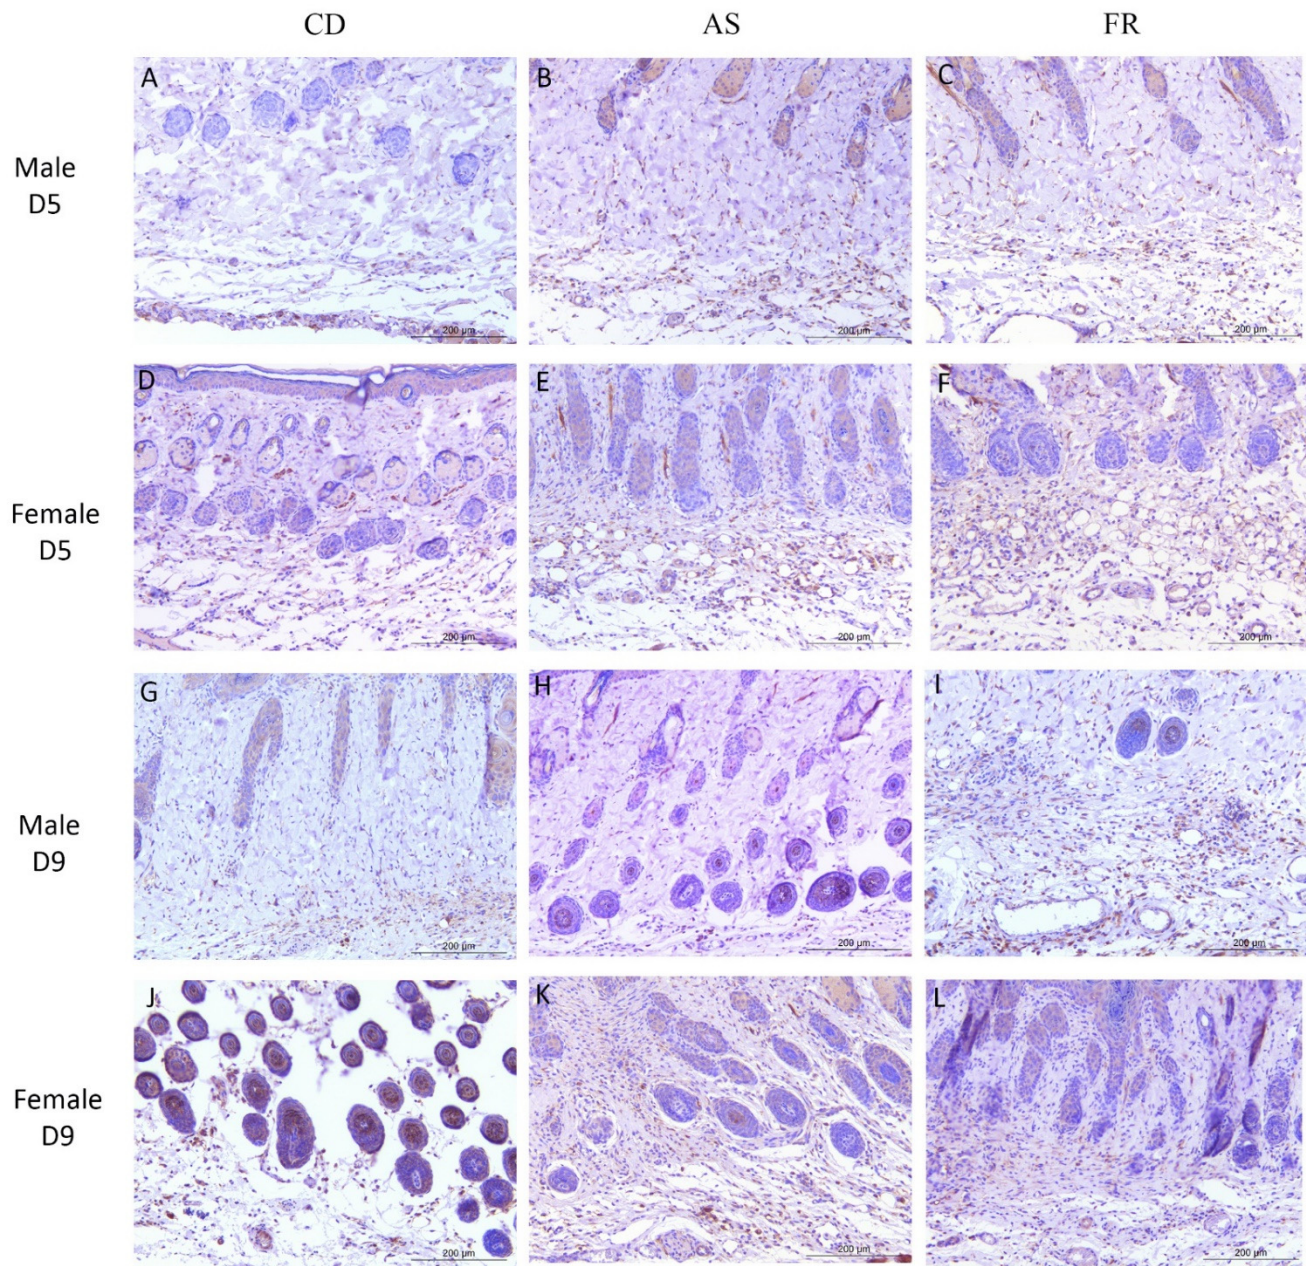

**Table S1.** Teklad Global 18% Protein Rodent Diet macronutrient composition.

| Macronutrients           | % kcal |
|--------------------------|--------|
| Crude Protein            | 18.6   |
| Fat (ether extract)      | 6.2    |
| Carbohydrate (available) | 44.2   |
| Crude Fibre              | 3.5    |
| Neutral Detergent Fibre  | 14.7   |
| Ash                      | 5.3    |
| Calories from Protein    | 24     |
| Calories from Fat        | 18     |

|                            |            |
|----------------------------|------------|
| Calories from Carbohydrate | 58         |
| Energy Density             | 3.1 kcal/g |

**Table S2.** Details of antibodies used in immunohistochemistry procedures.

| <b>Antibody</b>   | <b>Reference</b> | <b>Dilution</b> |
|-------------------|------------------|-----------------|
| Anti-IL1 $\beta$  | Abcam, ab9722    | 1:200           |
| Anti-CD68         | LS Bio, 32677    | 1:500           |
| Anti-TNF $\alpha$ | Abcam, 1793      | 1:100           |
